# Supplementary material for: Metabolic Profiling of Somatic Tissues from Monochamus alternatus (Coleoptera: Cerambycidae) Reveals Effects of Irradiation on Metabolism
Source: PubMed Central journal article supplement (PMC4100182; doi:10.3390/ijms150610806), 2014-06-16
Supplement: ijms-15-10806-s001.pdf [file ijms-15-10806-s001.pdf]

## Supplementary Information

**Table S1.** Result from pathway analysis of differential metabolites induced by 20 Gy irradiated males.

| Pathway                                             | Total | Expected | Hits | Raw p    | -log(p) | Impact  |
|-----------------------------------------------------|-------|----------|------|----------|---------|---------|
| Phenylalanine, tyrosine and tryptophan biosynthesis | 4     | 0.071076 | 2    | 0.001753 | 6.3462  | 1       |
| Phenylalanine metabolism                            | 10    | 0.17769  | 2    | 0.012342 | 4.3948  | 0.69231 |
| Aminoacyl-tRNA biosynthesis                         | 67    | 1.1905   | 4    | 0.026433 | 3.6331  | 0       |
| Ubiquinone and other terpenoid-quinone biosynthesis | 3     | 0.053307 | 1    | 0.052416 | 2.9485  | 0       |
| Alanine, aspartate and glutamate metabolism         | 23    | 0.40869  | 2    | 0.060525 | 2.8047  | 0.15203 |
| Galactose metabolism                                | 26    | 0.46199  | 2    | 0.07535  | 2.5856  | 0       |
| Ascorbate and aldarate metabolism                   | 6     | 0.10661  | 1    | 0.10223  | 2.2805  | 0       |
| Histidine metabolism                                | 7     | 0.12438  | 1    | 0.11828  | 2.1347  | 1       |
| Beta-Alanine metabolism                             | 13    | 0.231    | 1    | 0.20902  | 1.5653  | 0       |
| Glycerolipid metabolism                             | 16    | 0.2843   | 1    | 0.25101  | 1.3823  | 0       |
| Propanoate metabolism                               | 18    | 0.31984  | 1    | 0.27782  | 1.2808  | 0       |
| Fructose and mannose metabolism                     | 18    | 0.31984  | 1    | 0.27782  | 1.2808  | 0.15082 |
| Pentose phosphate pathway                           | 19    | 0.33761  | 1    | 0.29089  | 1.2348  | 0       |
| Citrate cycle (TCA cycle)                           | 20    | 0.35538  | 1    | 0.30373  | 1.1916  | 0.02566 |
| Butanoate metabolism                                | 21    | 0.37315  | 1    | 0.31635  | 1.1509  | 0       |
| Pyruvate metabolism                                 | 24    | 0.42646  | 1    | 0.35293  | 1.0415  | 0       |
| Inositol phosphate metabolism                       | 24    | 0.42646  | 1    | 0.35293  | 1.0415  | 0.2043  |
| Glutathione metabolism                              | 26    | 0.46199  | 1    | 0.37628  | 0.97742 | 0       |
| Tyrosine metabolism                                 | 30    | 0.53307  | 1    | 0.42061  | 0.86604 | 0.18795 |
| Arginine and proline metabolism                     | 37    | 0.65745  | 1    | 0.49113  | 0.71106 | 0       |
| Purine metabolism                                   | 64    | 1.1372   | 1    | 0.69427  | 0.3649  | 0.01409 |

**Table S2.** Result from pathway analysis of differential metabolites induced by 40 Gy irradiated males.

| Pathway                                             | Total | Expected | Hits | Raw p    | -log(p)  | Impact  |
|-----------------------------------------------------|-------|----------|------|----------|----------|---------|
| Aminoacyl-tRNA biosynthesis                         | 67    | 2.7779   | 10   | 0.00022  | 8.4201   | 0       |
| Alanine, aspartate and glutamate metabolism         | 23    | 0.9536   | 5    | 0.00186  | 6.2872   | 0.33784 |
| Phenylalanine, tyrosine and tryptophan biosynthesis | 4     | 0.16584  | 2    | 0.009555 | 4.6507   | 1       |
| Galactose metabolism                                | 26    | 1.078    | 4    | 0.019652 | 3.9296   | 0.40731 |
| Nitrogen metabolism                                 | 7     | 0.29023  | 2    | 0.030884 | 3.4775   | 0       |
| Citrate cycle (TCA cycle)                           | 20    | 0.82922  | 3    | 0.046215 | 3.0745   | 0.09774 |
| Phenylalanine metabolism                            | 10    | 0.41461  | 2    | 0.061161 | 2.7942   | 0.69231 |
| Valine, leucine and isoleucine biosynthesis         | 13    | 0.53899  | 2    | 0.098042 | 2.3224   | 0.33333 |
| Ubiquinone and other terpenoid-quinone biosynthesis | 3     | 0.12438  | 1    | 0.11941  | 2.1252   | 0       |
| D-Glutamine and D-glutamate metabolism              | 5     | 0.20731  | 1    | 0.19116  | 1.6546   | 0       |
| Arginine and proline metabolism                     | 37    | 1.5341   | 3    | 0.19469  | 1.6363   | 0       |
| Ascorbate and aldarate metabolism                   | 6     | 0.24877  | 1    | 0.22486  | 1.4923   | 0       |
| Cyanoamino acid metabolism                          | 6     | 0.24877  | 1    | 0.22486  | 1.4923   | 0       |
| Linoleic acid metabolism                            | 6     | 0.24877  | 1    | 0.22486  | 1.4923   | 1       |
| Histidine metabolism                                | 7     | 0.29023  | 1    | 0.25719  | 1.3579   | 1       |
| Glycine, serine and threonine metabolism            | 25    | 1.0365   | 2    | 0.27787  | 1.2806   | 0.32883 |
| Glutathione metabolism                              | 26    | 1.078    | 2    | 0.29363  | 1.2255   | 0       |
| Methane metabolism                                  | 9     | 0.37315  | 1    | 0.31795  | 1.1459   | 0       |
| Nicotinate and nicotinamide metabolism              | 9     | 0.37315  | 1    | 0.31795  | 1.1459   | 0       |
| Tyrosine metabolism                                 | 30    | 1.2438   | 2    | 0.35608  | 1.0326   | 0.18795 |
| Beta-Alanine metabolism                             | 13    | 0.53899  | 1    | 0.42526  | 0.85505  | 0       |
| Fatty acid biosynthesis                             | 38    | 1.5755   | 2    | 0.4745   | 0.74549  | 0       |
| Glyoxylate and dicarboxylate metabolism             | 16    | 0.66338  | 1    | 0.49475  | 0.70371  | 0       |
| Starch and sucrose metabolism                       | 17    | 0.70484  | 1    | 0.51603  | 0.66159  | 0.02799 |
| Propanoate metabolism                               | 18    | 0.7463   | 1    | 0.53644  | 0.6228   | 0       |
| Fructose and mannose metabolism                     | 18    | 0.7463   | 1    | 0.53644  | 0.6228   | 0.15082 |
| Pentose phosphate pathway                           | 19    | 0.78776  | 1    | 0.55601  | 0.58697  | 0       |
| Butanoate metabolism                                | 21    | 0.87068  | 1    | 0.59275  | 0.52298  | 0       |
| Porphyrin and chlorophyll metabolism                | 23    | 0.9536   | 1    | 0.62653  | 0.46757  | 0       |
| Tryptophan metabolism                               | 23    | 0.9536   | 1    | 0.62653  | 0.46757  | 0.375   |
| Pyruvate metabolism                                 | 24    | 0.99506  | 1    | 0.64237  | 0.44259  | 0       |
| Inositol phosphate metabolism                       | 24    | 0.99506  | 1    | 0.64237  | 0.44259  | 0.2043  |
| Fatty acid elongation in mitochondria               | 27    | 1.1194   | 1    | 0.68607  | 0.37678  | 0       |
| Amino sugar and nucleotide sugar metabolism         | 34    | 1.4097   | 1    | 0.76875  | 0.26299  | 0       |
| Valine, leucine and isoleucine degradation          | 35    | 1.4511   | 1    | 0.77867  | 0.25017  | 0       |
| Fatty acid metabolism                               | 38    | 1.5755   | 1    | 0.806    | 0.21567  | 0       |
| Pyrimidine metabolism                               | 41    | 1.6999   | 1    | 0.83003  | 0.18629  | 0       |
| Purine metabolism                                   | 64    | 2.6535   | 1    | 0.93919  | 0.062736 | 0       |
